# Supplementary material for: Graphical and Numerical Analysis of the Components of Gene Effect on the Quality Traits of Bread Wheat (Triticum aestivum L.) under Varying Environmental Conditions
Source: MDPI journal article supplement (doi:10.3390/agriculture12122055), 2022-11-30
Supplement: s1 [file s1]

**Table S1. Mean weekly weather parameters during the crop season.**

| Month.<br>and year | Std.<br>Week     | Temperature |       | Relative humidity |           | Rainfall (mm) |
|--------------------|------------------|-------------|-------|-------------------|-----------|---------------|
|                    |                  | Max.        | Min.  | Morning           | Afternoon |               |
| November, 2018     | 46 <sup>th</sup> | 34.50       | 14.40 | 87.90             | 35.14     | 0.0           |
|                    | 47 <sup>th</sup> | 34.39       | 16.14 | 88.57             | 38.43     | 0.0           |
|                    | 48 <sup>th</sup> | 30.89       | 13.89 | 82.43             | 39.76     | 0.0           |
| December, 2018     | 49 <sup>th</sup> | 30.10       | 13.56 | 87.14             | 44.57     | 0.0           |
|                    | 50 <sup>th</sup> | 28.06       | 11.10 | 81.86             | 39.29     | 0.0           |
|                    | 51 <sup>st</sup> | 27.69       | 9.10  | 84.71             | 34.71     | 0.0           |
|                    | 52 <sup>nd</sup> | 27.59       | 7.86  | 80.00             | 28.90     | 0.0           |
| January, 2019      | 1 <sup>st</sup>  | 28.74       | 8.16  | 87.14             | 31.43     | 0.0           |
|                    | 2 <sup>nd</sup>  | 26.53       | 9.43  | 83.14             | 37.14     | 0.0           |
|                    | 3 <sup>rd</sup>  | 29.71       | 10.67 | 88.43             | 37.43     | 0.0           |
|                    | 4 <sup>th</sup>  | 25.50       | 10.71 | 86.14             | 38.86     | 0.0           |
|                    | 5 <sup>th</sup>  | 26.86       | 10.93 | 76.00             | 37.02     | 0.0           |
| February, 2019     | 6 <sup>th</sup>  | 27.46       | 10.13 | 87.57             | 33.86     | 0.0           |
|                    | 7 <sup>th</sup>  | 30.67       | 12.73 | 84.14             | 33.57     | 0.0           |
|                    | 8 <sup>th</sup>  | 32.00       | 14.14 | 89.29             | 38.71     | 0.0           |
|                    | 9 <sup>th</sup>  | 31.59       | 15.24 | 70.29             | 31.71     | 0.0           |
| March, 2019        | 10 <sup>th</sup> | 31.07       | 14.57 | 78.57             | 30.43     | 0.0           |
|                    | 11 <sup>th</sup> | 32.50       | 15.43 | 67.57             | 21.29     | 0.0           |
|                    | 12 <sup>th</sup> | 35.93       | 17.54 | 70.71             | 26.19     | 0.0           |
| November, 2019     | 46 <sup>th</sup> | 31.10       | 19.70 | 89.60             | 45.30     | 0.0           |
|                    | 47 <sup>th</sup> | 31.40       | 17.18 | 91.00             | 45.70     | 0.0           |
|                    | 48 <sup>th</sup> | 31.20       | 19.60 | 90.60             | 54.00     | 0.0           |
| December, 2019     | 49 <sup>th</sup> | 28.20       | 18.10 | 73.30             | 51.00     | 0.0           |
|                    | 50 <sup>th</sup> | 28.20       | 13.60 | 87.40             | 46.10     | 0.0           |
|                    | 51 <sup>st</sup> | 27.20       | 15.50 | 82.60             | 55.60     | 0.0           |
|                    | 52 <sup>nd</sup> | 22.50       | 11.20 | 70.00             | 37.60     | 0.0           |
| January, 2020      | 1 <sup>st</sup>  | 25.50       | 12.70 | 89.00             | 48.00     | 0.0           |
|                    | 2 <sup>nd</sup>  | 26.60       | 13.80 | 80.00             | 44.00     | 0.0           |
|                    | 3 <sup>rd</sup>  | 24.60       | 9.70  | 87.00             | 48.00     | 0.0           |
|                    | 4 <sup>th</sup>  | 27.80       | 13.80 | 84.00             | 44.00     | 0.0           |
|                    | 5 <sup>th</sup>  | 26.40       | 11.00 | 83.00             | 37.00     | 0.0           |
| February, 2020     | 6 <sup>th</sup>  | 27.60       | 12.01 | 83.00             | 37.00     | 0.0           |
|                    | 7 <sup>th</sup>  | 32.30       | 15.00 | 79.00             | 32.00     | 0.0           |
|                    | 8 <sup>th</sup>  | 32.00       | 15.20 | 79.00             | 32.00     | 0.0           |
|                    | 9 <sup>th</sup>  | 33.20       | 16.50 | 83.00             | 31.00     | 0.0           |
| March, 2020        | 10 <sup>th</sup> | 31.20       | 16.50 | 83.00             | 31.00     | 0.0           |
|                    | 11 <sup>th</sup> | 31.00       | 15.80 | 65.00             | 20.00     | 0.0           |
|                    | 12 <sup>th</sup> | 35.60       | 15.80 | 77.00             | 32.00     | 0.0           |

**Year : 2018-19 & 2019-20****Latitude: North: 22° 35'****Zone: Central Zone****East: 72° 55'****State: Gujarat****Altitude: 45 m above M.S.L.****Location: Anand****Soil type: Sandy loam**
